# Supplementary material for: Substituted m-phenylene bridges as strong ferromagnetic couplers for Cuii–bridge–Cuii magnetic interactions: new perspectives
Source: Royal Society of Chemistry journal article supplement (doi:10.1039/b510074g), 2005-01-01

**Figure S1**

(Models according to nomenclature in Table 1 ; Model A = complex 1 and model G = complex 3 ; See Figure 3)

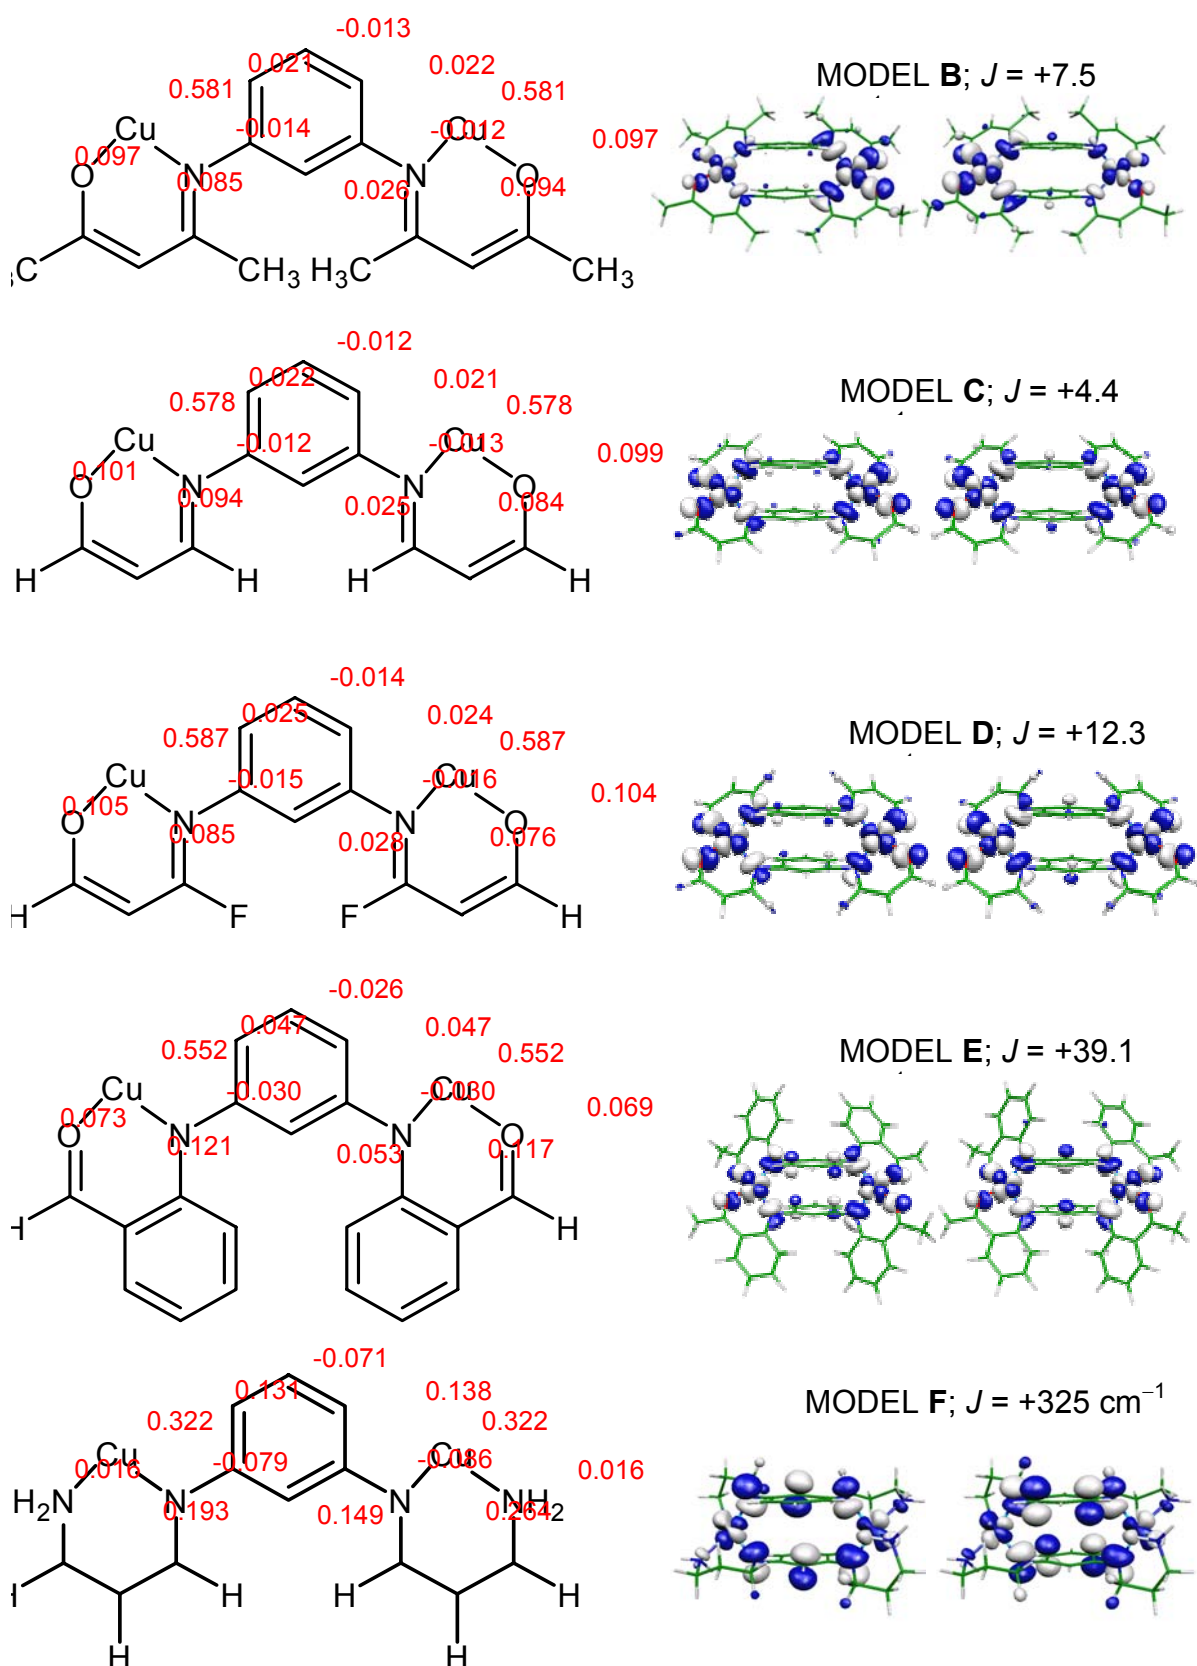

Figure S2

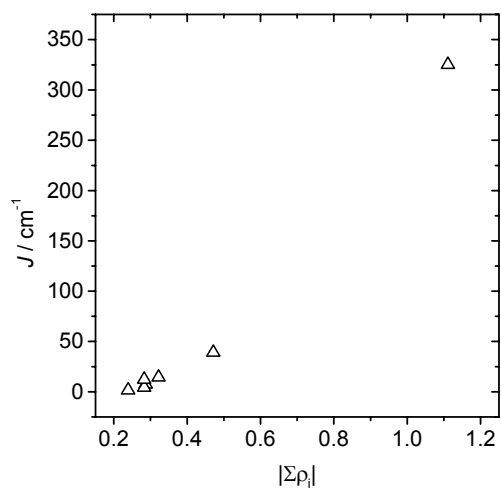

Figure S3

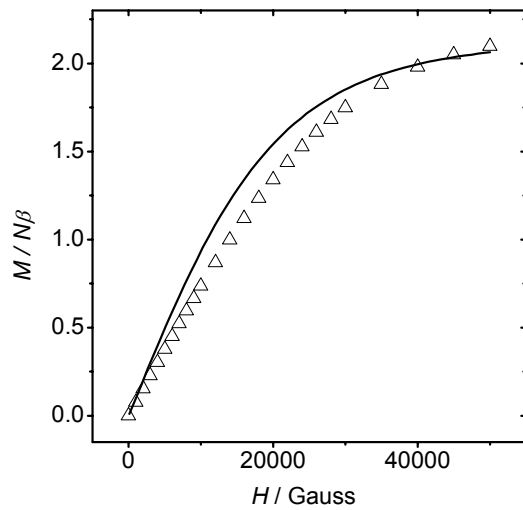

Figure S4.

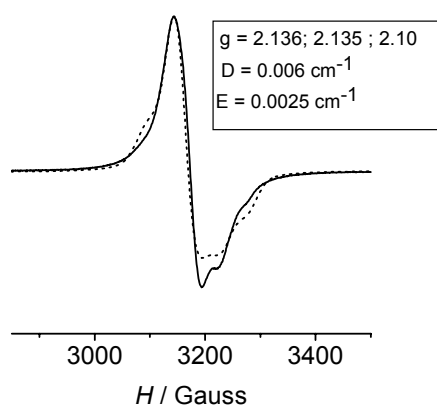

Supplement: b510074g.pdf [file b510074g.pdf]
